# Supplementary material for: Bartonella spp. and Coxiella burnetii Associated with Community-Acquired, Culture-Negative Endocarditis, Brazil
Source: PubMed Central journal article supplement (PMC4517744; doi:10.3201/eid2108.140343), 2015-08
Supplement: 14-0343-Techapp-s1.pdf [file 14-0343-Techapp-s1.pdf]

# *Bartonella* spp. and *Coxiella burnetii* Associated with Community-Acquired, Culture-Negative Endocarditis, Brazil

## Technical Appendix

### Indirect Immunofluorescence Assays

As recommended (1), we used the following antigens: *Bartonella henselae* RA2552, Lot 08–0039; *Bartonella quintana*, RA2551, Lot 08–0038 obtained from the Centers for Disease Control and Prevention (Atlanta, GA, USA). We also used *C. burnetii* antiphase I (SCIMEDX Corporation, Denville, NJ, USA).

### Immunohistochemical Analyses

The immunohistochemical analysis for *Bartonella henselae* was performed by Biocare Medical (Concord, CA, USA; clone H2A10). That for *Bartonella quintana* and *Coxiella burnetii* was performed by the Rickettsial Zoonoses Branch, Centers for Disease Control and Prevention.

### Molecular Methods

Molecular tests were used to confirm the serologic results and identify *Bartonella* species. From 10 *Bartonella* spp. positive patients, the serum was subjected to DNA extraction by using QIAamp DNA Mini Kit (QIAGEN, Valencia, CA, USA). From 4 patients whose cultures were positive for *coxiella*, nucleic acid was extracted by serum samples by using PureLink Viral RNA/DNA Mini Kit-Life Technologies (Invitrogen, Grand Island, NY, USA). We also performed DNA extraction from formalin-fixed, paraffin-embedded valve tissue specimens from 6 patients with specimens positive for *Bartonella* spp. and 3 positive for *C. burnetii* by using PureLink Genomic DNA Mini Kit - Life Technologies (Invitrogen).

Screening of samples was performed by using 3 *Bartonella* genus-specific single tube PCR and 1 nested PCR specific for *B. henselae*; amplicons generated were sequenced. Formalin-fixed, paraffin-embedded valve tissue specimens were also submitted to real-time PCR to detect *Bartonella* spp. (*gltA*). Serum samples and formalin-fixed, paraffin-embedded valve tissue specimens of patients whose results were positive for *C. burnetii* by immunofluorescence assay

were submitted to real-time PCR to detect *C. burnetii* (IS1111). The molecular methods used follow the protocol described in the Technical Appendix Table 1.

## References

1. Fournier PE, Mainardi JL, Raoult D. Value of microimmunofluorescence for diagnosis and follow-up of *Bartonella* endocarditis. Clin Diagn Lab Immunol. 2002;9:795–801. [PubMed](#)
2. Diniz PP, Maggi RG, Schwartz DS, Cadenas MB, Bradley JM, Hegarty B, et al. Canine bartonellosis: serologic and molecular prevalence in Brazil and evidence of co-infection with *Bartonella henselae* and *Bartonella vinsonii* subsp. *berkhoffii*. Vet Res. 2007;38:697–710. [PubMed](#)  
<http://dx.doi.org/10.1051/vetres:2007023>
3. Pitassi LH, de Paiva Diniz PP, Scorpio DG, Drummond MR, Lania BG, Barjas-Castro ML, et al. *Bartonella* spp. bacteremia in blood donors from Campinas, Brazil. PLoS Negl Trop Dis. 2015;9:e0003467 <http://dx.doi.org/10.1371/journal.pntd.0003467>. [PubMed](#)
4. Diaz MH, Bai Y, Malania L, Winchell JM, Kosoy MY. Development of a novel genus-specific real-time PCR assay for detection and differentiation of *Bartonella* species and genotypes. J Clin Microbiol. 2012;50:1645–9. [PubMed](#) <http://dx.doi.org/10.1128/JCM.06621-11>
5. Kawasato KH, de Oliveira LC, Velho PE, Yamamoto L, Del Negro GM, Okay TS. Detection of *Bartonella henselae* DNA in clinical samples including peripheral blood of immune competent and immune compromised patients by three nested amplifications. Rev Inst Med Trop Sao Paulo. 2013;55:1–6. [PubMed](#) <http://dx.doi.org/10.1590/S0036-46652013000100001>
6. Molia S, Chomel BB, Kasten RW, Leutenegger CM, Steele BR, Marker L, et al. Prevalence of *Bartonella* infection in wild African lions (*Panthera leo*) and cheetahs (*Acinonyx jubatus*). Vet Microbiol. 2004;100:31–41. [PubMed](#) <http://dx.doi.org/10.1016/j.vetmic.2004.01.007>
7. Schneeberger PM, Hermans MH, van Hannen EJ, Schellekens JJ, Leenders AC, Wever PC. Real-time PCR with serum samples is indispensable for early diagnosis of acute Q fever. Clin Vaccine Immunol. 2010;17:286–90. [PubMed](#) <http://dx.doi.org/10.1128/CVI.00454-09>

**Technical Appendix Table 1.** PCR types and references used in *Bartonella* spp. and *C. burnetii* analysis, Brazil\*

| Application                                     | Target gene                       | Reference |
|-------------------------------------------------|-----------------------------------|-----------|
| <i>Bartonella</i> spp. conventional PCR (ITS 1) | 16S–23S rRNA gene ITS             | (2)       |
| <i>Bartonella</i> spp. conventional PCR (ITS 2) | 16S–23S rRNA gene ITS             | (3)       |
| <i>Bartonella</i> spp. conventional PCR (srA)   | Transfer-mRNA (ssrA)              | (4)       |
| <i>Bartonella henselae</i> nested PCR (FtsZ)    | Cell division protein <i>FtsZ</i> | (5)       |
| <i>Bartonella</i> spp. real-time PCR (gltA)     | Citrate synthase gene             | (6)       |
| <i>C. burnetii</i> real-time PCR (IS 1111)      | Insertion element                 | (7)       |

\*ITS, intergenic transcribed spacer.

**Technical Appendix Table 2.** Serologic titles and PCR results for patients with infective endocarditis caused by *Bartonella* spp. or *C. burnetii*\*

| Bartonella<br>Cases | Serology (IFA) IgG |                    |                                   | PCR (tissue or serum)  |       |      |      |                    |        |
|---------------------|--------------------|--------------------|-----------------------------------|------------------------|-------|------|------|--------------------|--------|
|                     | <i>B.</i>          |                    | <i>C. burnetii</i>                | <i>Bartonella</i> spp. |       |      |      | <i>C. burnetii</i> |        |
|                     | <i>henselae</i>    | <i>B. quintana</i> | Antiphase I<br><i>C. burnetii</i> | ITS 1                  | ITS 2 | ssra | FtsZ | gltA               | IS1111 |
| 1                   | ≥1,600             | ≥1,600             | <800                              | +                      | +     | +    | Neg  | Neg                | NP     |
| 2                   | ≥1,600             | ≥1,600             | <800                              | Neg                    | +     | +    | +    | +                  | NP     |
| 3                   | ≥1,600             | ≥1,600             | <800                              | Neg                    | +     | +    | +    | +                  | NP     |
| 4                   | ≥1,600             | ≥1,600             | <800                              | Neg                    | Neg   | Neg  | Neg  | NP                 | NP     |
| 5                   | ≥1,600             | ≥1,600             | <800                              | Neg                    | +     | Neg  | Neg  | +                  | NP     |
| 6                   | ≥1,600             | ≥1,600             | <800                              | Neg                    | +     | +    | Neg  | Neg                | NP     |
| 7                   | ≥1,600             | ≥1,600             | <800                              | Neg                    | +     | Neg  | +    | NP                 | NP     |
| 8                   | 800                | <800               | <800                              | Neg                    | +     | Neg  | Neg  | NP                 | NP     |
| 9                   | ≥1,600             | ≥1,600             | <800                              | Neg                    | Neg   | Neg  | Neg  | NP                 | NP     |
| 10                  | 800                | ≥1,600             | <800                              | Neg                    | +     | Neg  | Neg  | Neg                | NP     |
| 11                  | <800               | <800               | 25,600                            | NP                     | NP    | NP   | NP   | NP                 | +      |
| 12                  | <800               | <800               | 6,400                             | NP                     | NP    | NP   | NP   | NP                 | +      |
| 13                  | <800               | <800               | 25,600                            | NP                     | NP    | NP   | NP   | NP                 | +      |
| 14                  | <800               | <800               | 51,200                            | NP                     | NP    | NP   | NP   | NP                 | +      |

\*IFA, immunofluorescence assay; ITS, intergenic transcribed spacer; +, positive; Neg, negative; NP, not performed.

**Technical Appendix Table 3.** Clinical and evolving characteristics of 14 patients with endocarditis caused by *Bartonella* spp. and *C. burnetii*, Brazil\*

| Patients by infection type | Age, y/sex | Epidemiology                             | Valve/position    | Antimicrobial drug treatment (d) †              | Endocarditis-related complications | Surgical treatment | Cause of death                                                                                                                   | <i>C. burnetii</i> serology |                     |
|----------------------------|------------|------------------------------------------|-------------------|-------------------------------------------------|------------------------------------|--------------------|----------------------------------------------------------------------------------------------------------------------------------|-----------------------------|---------------------|
|                            |            |                                          |                   |                                                 |                                    |                    |                                                                                                                                  | At diagnosis                | At end of treatment |
| <i>Bartonella</i> spp.     |            |                                          |                   |                                                 |                                    |                    |                                                                                                                                  |                             |                     |
| 1                          | 35/M       | Flea                                     | Prosthesis/aortic | Oxacillin + ceftriaxone (30)<br>Gentamicin (17) | –                                  | Yes                | NA                                                                                                                               |                             | Neg                 |
| 2                          | 65/M       | Domestic cat                             | Native/aortic     | Oxacillin + ceftriaxone (19)<br>Gentamicin (11) | Paravalvular abscess               | Yes                | Heart failure                                                                                                                    |                             | Neg                 |
| 3                          | 52/M       | Domestic cat; cat scratch                | Prosthesis/aortic | Oxacillin + Penicillin (5)                      | –                                  | No                 | Malignant tachyarrhythmia                                                                                                        |                             | Neg                 |
| 4                          | 31/F       | Domestic cat; cat scratch                | Prosthesis/mitral | Oxacillin + ceftriaxone (42)                    | –                                  | No                 | NA                                                                                                                               |                             | Neg                 |
| 5                          | 60/M       | Domestic cat                             | Native/aortic     | Ceftriaxone (45)<br>Gentamicin (30)             | Paravalvular abscess + fistula     | Yes                | NA                                                                                                                               |                             | Neg                 |
| 6                          | 58/M       | Homelessness                             | Native/aortic     | Oxacillin + ceftriaxone (42)<br>Gentamicin (30) | –                                  | Yes                | NA                                                                                                                               |                             | Neg                 |
| 7                          | 70/M       | Domestic cat                             | Native/aortic     | Penicillin (24)+<br>Gentamicin (24)             | CNS emboli + Paravalvular abscess  | No                 | Heart failure and septic shock                                                                                                   |                             | Neg                 |
| 8                          | 41/M       | Lice; scabies                            | Prosthesis/aortic | Oxacillin + penicillin (62)<br>Gentamicin (28)  | Paravalvular abscess               | Yes                | NA                                                                                                                               |                             | Neg                 |
| 9                          | 21/M       | Domestic cat                             | Native/mitral     | Penicillin (28)<br>Gentamicin (14)              | –                                  | No                 | NA                                                                                                                               |                             | Neg                 |
| 10                         | 51/M       | Homelessness                             | Native/aortic     | Ceftriaxone (30)<br>Gentamicin (3)              | –                                  | Yes                | Heart failure                                                                                                                    |                             | Neg                 |
| <i>C. burnetii</i>         |            |                                          |                   |                                                 |                                    |                    |                                                                                                                                  |                             |                     |
| 11                         | 41/M       | Rural residence; consumption of raw milk | Native/mitral     | Ciprofloxacin + doxycycline*                    | Heart failure                      | Yes                | Septic shock caused by nosocomial pneumonia (day 5 after cardiac surgery and day 26 after start of <i>C. burnetii</i> treatment) | 25,600                      | NP                  |
| 12                         | 45/M       | Rural residence; consumption of raw milk | Prosthesis/aortic | Ciprofloxacin + doxycycline*                    | Heart failure                      | Yes                | NA                                                                                                                               | 6,400                       | <800                |
| 13                         | 34/F       | Rural residence; consumption of raw milk | Prosthesis/mitral | Ciprofloxacin + doxycycline*                    | –                                  | Yes                | NA                                                                                                                               | 25,600                      | 3,200               |
| 14                         | 64/M       | Rural residence; consumption of raw milk | Prosthesis/aortic | Ciprofloxacin + doxycycline*                    | –                                  | No                 | NA                                                                                                                               | 51,200                      | 12,800              |

\*–, no identified complications; NA, not applicable (patient did not die); Neg, negative; NP, not performed (patient died before end of treatment).  
 †Hydroxychloroquine was unavailable; second-line treatment for *C. burnetii* endocarditis (ciprofloxacin and doxycycline for 72 mos.) was used.

**Technical Appendix Table 4.** Distribution of clinical, laboratory, and echocardiographic features of 221 patients with community-acquired endocarditis, according to whether *Bartonella* spp. infection was involved\*

| Characteristic                            | <i>Bartonella</i> spp.<br>endocarditis no. (%) | Non- <i>Bartonella</i> spp.<br>endocarditis no. (%) | <i>p</i> value |
|-------------------------------------------|------------------------------------------------|-----------------------------------------------------|----------------|
| Male sex                                  | 9 (10)                                         | 135 (64.0)                                          | 0.092          |
| Age ≥60 y                                 | 3 (30)                                         | 87 (41.2)                                           | 0.480          |
| Body mass index ≥25 kg/m <sup>2</sup>     | 1 (10)                                         | 71 (37.2)                                           | 0.081          |
| Concurrent conditions                     | 8 (80)                                         | 144 (68.2)                                          | 0.433          |
| Valvular heart disease                    | 7 (70)                                         | 177 (83.9)                                          | 0.250          |
| Previous endocarditis                     | 1 (10)                                         | 25 (11.8)                                           | 0.859          |
| Duration of symptoms ≥30 d                | 8 (80)                                         | 95 (45.2)                                           | 0.048          |
| Fever                                     | 9 (90)                                         | 188 (89.5)                                          | 0.992          |
| ≥1 affected valve                         | 0 (0)                                          | 17 (8.1)                                            | NA             |
| C-reactive protein ≥80 mg/L               | 2 (25)                                         | 90 (62.5)                                           | 0.032          |
| Severe sepsis                             | 4 (40)                                         | 76 (36.0)                                           | 0.798          |
| Moderate or severe valvular regurgitation | 8 (80)                                         | 153 (73.2)                                          | 0.634          |
| Vegetation on echocardiography            | 9 (90)                                         | 162 (77.5)                                          | 0.351          |
| Glomerulonephritis                        | 1 (10)                                         | 43 (24.9)                                           | 0.285          |

\**p* value determined by Pearson  $\chi^2$  or Fisher exact test; NA, not applicable.
